# Supplementary material for: Benchmarking the Nutrition-Related Policies and Commitments of Major Food Companies in Australia, 2018
Source: Int J Environ Res Public Health. 2020 Aug 22;17(17):6118. doi: 10.3390/ijerph17176118 (PMC7504100; doi:10.3390/ijerph17176118)
Supplement: Supplementary file 1 [file ijerph-17-06118-s001.zip]

Archive with 5 entries (5 files):
- File S1 - Company scorecards IJERPH.pdf
- Table S1 - BIA-Obesity Australia 2018 IJERPH.docx
- Table S2 - BIA-Obesity Australia 2018 IJERPH.docx
- Table S3 - BIA-Obesity Australia 2018 IJERPH.docx
- Table S4 - BIA-Obesity Australia 2018 IJERPH.docx
